# Supplementary material for: Elemental composition of ambient aerosols measured with high temporal resolution using an online XRF spectrometer
Source: Copernicus journal article supplement (doi:10.5194/amt-2016-383), 2017-01-11
Supplement: Supplementary file 1 [file amt-2016-383-supplement.pdf]

## **S1. Ambient filter samples for method intercomparisons**

A quarter each of three NABEL filters of the series analysed at IDAEA were also analysed with XRF at CES and with ICP-MS at ERG. This allows for an intercomparison between benchtop XRF and ICP-MS, between ICP-MS of two different laboratories, and between Xact XRF and benchtop XRF. The elements Zn, Sr, Cu, Pb, Fe, K, Ca, Mn, Se, and Ba were selected for this comparison. Benchtop XRF required no further sample preparation except punching a 47-mm piece of the original filter. IDAEA's digestion protocol is described in the main paper. Of three different filter blanks, blank 1 appeared contaminated and was not further considered, blanks 2 and 3 were averaged and subtracted from the analysis, but the values are not reported. ERG followed a protocol of the USEPA describing the multi-elemental determination of total metals by ICP-MS in ambient air samples collected on 47mm Teflon<sup>®</sup> filters following guidelines in EPA method IO-3.5 and EPA FEM Method "Standard Operating Procedure for the Determination of Lead in PM10 by Inductively Coupled Plasma Mass Spectrometry (ICPMS) with Hot Block Dilute Acid and Hydrogen Peroxide Filter Extraction" (EQL-0512-202). The filters were digested in a HotBlock<sup>™</sup> for 2.5 hours using an extraction fluid containing 1.85% nitric acid (HNO<sub>3</sub>), 0.5% hydrochloric acid (HCl), and 0.17% hydrofluoric acid (HF) with 0.33 mg/L of gold added for mercury stabilization. One aliquot of hydrogen peroxide (H<sub>2</sub>O<sub>2</sub>) was added after 1.5 hours of extraction and was allowed to effervesce. The extract was analyzed by ICP-MS and the data were collected using the manufacturer's software. The results are given in Table S1.

**Table S1. Analyses of three ambient (NABEL) samples (1, 6 and 12 August 2015) from Härkingen. Comparisons of Xact and benchtop XRF (CES), benchtop XRF (CES) and ICP-MS (IDAEA and ERG), and ICP-MS at two laboratories (IDAEA and ERG). NR = not reported; BD = below limit of detection.**

| Sample        | Element | Xact Daily Average (ng m <sup>-3</sup> ) | CES XRF Results (ng m <sup>-3</sup> ) | Background (ng cm <sup>-2</sup> ) | IDAEA Results (ng m <sup>-3</sup> ) | ERG Values (ng m <sup>-3</sup> ) | Background (ng m <sup>-3</sup> ) | % Difference                        |                       |                               |                     |                                     |                      |                             |                      |
|---------------|---------|------------------------------------------|---------------------------------------|-----------------------------------|-------------------------------------|----------------------------------|----------------------------------|-------------------------------------|-----------------------|-------------------------------|---------------------|-------------------------------------|----------------------|-----------------------------|----------------------|
|               |         |                                          |                                       |                                   |                                     |                                  |                                  | CES vs. IDAEA (CES - IDAEA) / IDAEA | Average CES vs. IDAEA | CES vs. ERG (CES - ERG) / ERG | Average CES vs. ERG | ERG vs. IDAEA (ERG - IDAEA) / IDAEA | Average ERG vs IDAEA | Xact vs. CES (Xact-CES)/CES | Average Xact vs. CES |
| Field_PSI_213 | Zn      | 31.2                                     | 19.2                                  | 1.0                               | 19.6                                | 22.4                             | 64.0                             | -1.9                                | -1.5                  | -14.2                         | -0.8                | 14.4                                | 0.4                  | 62.1                        | 59.2                 |
| Field_PSI_218 |         | 25.4                                     | 16.5                                  | 1.0                               | 15.8                                | 15.9                             | 64.0                             | 4.2                                 |                       | 3.5                           |                     | 0.7                                 |                      | 53.9                        |                      |
| Field_PSI_224 |         | 30.4                                     | 18.8                                  | 1.0                               | 20.2                                | 17.4                             | 64.0                             | -6.7                                |                       | 8.2                           |                     | -13.7                               |                      | 61.4                        |                      |
| Field_PSI_213 | Sr      | NR                                       | 60.0                                  | 0.0                               | 61.1                                | 58.6                             | 0.9                              | -1.9                                | -36.6                 | 2.4                           | -32.5               | -4.1                                | -8.3                 | NR                          | NR                   |
| Field_PSI_218 |         | NR                                       | 1.5                                   | 0.0                               | 2.0                                 | 1.9                              | 0.9                              | -23.9                               |                       | -18.4                         |                     | -6.8                                |                      | NR                          |                      |
| Field_PSI_224 |         | NR                                       | 0.2                                   | 0.0                               | 1.1                                 | 0.9                              | 0.9                              | -84.0                               |                       | -81.4                         |                     | -14.0                               |                      | NR                          |                      |
| Field_PSI_213 | Cu      | 58.2                                     | 44.6                                  | 0.0                               | 42.2                                | 49.9                             | 1.9                              | 5.5                                 | -0.1                  | -10.6                         | -15.2               | 18.0                                | 17.8                 | 30.5                        | 50.6                 |
| Field_PSI_218 |         | 39.1                                     | 25.8                                  | 0.0                               | 26.1                                | 31.3                             | 1.9                              | -1.3                                |                       | -17.6                         |                     | 19.8                                |                      | 51.5                        |                      |
| Field_PSI_224 |         | 35.8                                     | 21.1                                  | 0.0                               | 22.1                                | 25.5                             | 1.9                              | -4.5                                |                       | -17.3                         |                     | 15.5                                |                      | 69.7                        |                      |
| Field_PSI_213 | Pb      | 4.4                                      | NR                                    | 0.0                               | 4.4                                 | 4.5                              | 8.7                              | NR                                  | NR                    | NR                            | NR                  | 2.2                                 | -14.8                | NR                          | NR                   |
| Field_PSI_218 |         | 4.3                                      | NR                                    | 0.0                               | 4.0                                 | 3.4                              | 8.7                              | NR                                  |                       | NR                            |                     | -15.5                               |                      | NR                          |                      |
| Field_PSI_224 |         | 5.3                                      | NR                                    | 0.0                               | 4.6                                 | 3.2                              | 8.7                              | NR                                  |                       | NR                            |                     | -31.1                               |                      | NR                          |                      |
| Field_PSI_213 | Fe      | 757.1                                    | 529.7                                 | 33.6                              | 465.5                               | 479.4                            | 74.9                             | 13.8                                | 12.4                  | 10.5                          | 9.7                 | 3.0                                 | 2.5                  | 42.9                        | 35.6                 |
| Field_PSI_218 |         | 1021.1                                   | 805.4                                 | 32.8                              | 685.4                               | 732.4                            | 74.9                             | 17.5                                |                       | 10.0                          |                     | 6.9                                 |                      | 26.8                        |                      |
| Field_PSI_224 |         | 906.6                                    | 661.6                                 | 32.9                              | 624.7                               | 609.7                            | 74.9                             | 5.9                                 |                       | 8.5                           |                     | -2.4                                |                      | 37.0                        |                      |
| Field_PSI_213 | K       | 2640.7                                   | 2046.1                                | 0.0                               | 2263.0                              | 2663.0                           | 41.2                             | -9.6                                | 9.7                   | -23.2                         | 0.3                 | 17.7                                | 9.9                  | 29.1                        | 32.9                 |
| Field_PSI_218 |         | 225.8                                    | 194.2                                 | 0.0                               | 143.0                               | 156.4                            | 41.2                             | 35.8                                |                       | 24.2                          |                     | 9.4                                 |                      | 16.3                        |                      |
| Field_PSI_224 |         | 209.5                                    | 136.7                                 | 0.0                               | 133.0                               | 136.7                            | 41.2                             | 2.8                                 |                       | 0.0                           |                     | 2.8                                 |                      | 53.2                        |                      |
| Field_PSI_213 | Ca      | 213.5                                    | 172.1                                 | 12.9                              | 160.6                               | 795.5                            | 190.0                            | 7.2                                 | 4.7                   | -78.4                         | -27.6               | 395.4                               | 135.6                | 24.1                        | 38.6                 |
| Field_PSI_218 |         | 791.9                                    | 597.8                                 | 12.6                              | 555.7                               | 602.9                            | 190.0                            | 7.6                                 |                       | -0.9                          |                     | 8.5                                 |                      | 32.5                        |                      |
| Field_PSI_224 |         | 517.9                                    | 324.9                                 | 12.7                              | 327.2                               | 336.9                            | 190.0                            | -0.7                                |                       | -3.6                          |                     | 3.0                                 |                      | 59.4                        |                      |
| Field_PSI_213 | Mn      | 7.3                                      | 8.3                                   | 0.1                               | 4.3                                 | 5.8                              | 1.4                              | 94.7                                | 57.5                  | 42.3                          | 25.5                | 36.9                                | 24.6                 | -12.2                       | 3.4                  |
| Field_PSI_218 |         | 12.3                                     | 11.9                                  | 0.1                               | 8.1                                 | 9.7                              | 1.4                              | 46.9                                |                       | 22.8                          |                     | 19.6                                |                      | 3.1                         |                      |
| Field_PSI_224 |         | 11.1                                     | 9.3                                   | 0.1                               | 7.1                                 | 8.4                              | 1.4                              | 30.9                                |                       | 11.5                          |                     | 17.3                                |                      | 19.3                        |                      |
| Field_PSI_213 | Se      | BD                                       | BD                                    | 0.0                               | 0.3                                 | 0.5                              | 0.1                              | NR                                  | 168.8                 | NR                            | -13.3               | 64.0                                | 105.1                | NR                          | -25.5                |
| Field_PSI_218 |         | 0.3                                      | BD                                    | 0.0                               | 0.4                                 | 0.5                              | 0.1                              | NR                                  |                       | NR                            |                     | 41.3                                |                      | NR                          |                      |
| Field_PSI_224 |         | 0.7                                      | 1.0                                   | 0.0                               | 0.4                                 | 1.1                              | 0.1                              | 168.8                               |                       | -13.3                         |                     | 210.0                               |                      | -25.5                       |                      |
| Field_PSI_213 | Ba      | 109.1                                    | 88.9                                  | 13.6                              | 110.9                               | 111.0                            | 81.1                             | -19.8                               | -19.8                 | -19.9                         | -19.9               | 0.1                                 | -33.2                | 22.7                        | 22.7                 |
| Field_PSI_218 |         | 14.3                                     | BD                                    | 13.3                              | 10.7                                | 8.5                              | 81.1                             | NR                                  |                       | NR                            |                     | -20.5                               |                      | NR                          |                      |
| Field_PSI_224 |         | 9.2                                      | BD                                    | 13.3                              | 8.6                                 | 1.8                              | 81.1                             | NR                                  |                       | NR                            |                     | -79.0                               |                      | NR                          |                      |

- 5 The data shows a somewhat better comparison between offline XRF and ICP than between online XRF (Xact) and ICP, though the scatter in the relative differences (XRF-ICP/ICP) varied from -37 % (Sr) to +57 % (Mn), if Se and Ba, for which only one filter shows concentrations above the XRF detection limit, are not considered. Comparing the ICP-MS results between the two labs (ERG-IDAEA/IDAEA) shows a range from -33 % (Ba) to +25 % (Mn), when Se and Ca are not considered. Se concentrations are close to their ICP MDL and hence rather uncertain, while Ca shows a problem with one
- 10 ERG measurement. If Ca and Se are excluded, the average relative difference between the two labs is -0.1 %, with a standard deviation of 19 %. The comparison of the daily averaged Xact values with the benchtop XRF values shows an average difference of 37 % (Xact-CES)/CES) for the elements Zn, Cu, Fe, K, Ca, and Mn, which is close to the observed mean difference to ICP. It is also consistent in the sense that all average differences Xact – CES for these elements are positive.

## S2. Spiked filter samples for method intercomparisons

- 15 CES produced a set of six quartz filters coated with known amounts of the elements Zn, Sr, Cu, Pb, and Fe. These filters were analysed with a benchtop XRF instrument by CES, and three each of them were sent to IDAEA-CSIC, and ERG for analysis with ICP-MS. The results are presented in Table S2. Notice that Pb is not reported for XRF, because of large variations of the measured values for quartz filters. This indicates a problem with the XRF fitting routine for quartz filters, as the issue is not seen with Teflon filters.

**Table S2. Spiked filter analyses for five elements. Comparison between XRF and ICP-MS analyses performed at three independent laboratories.**

| Sample Start Time | Sample    | Element | CES                                    |                                     |                                 | IDAEA<br>Conc.<br>(ng cm <sup>-2</sup> ) | ERG                                  |                                 | % Difference                              |                                               |                                           |                                        |                                  | Average Percent Difference                |                                               |                                           |                                        |                                  |
|-------------------|-----------|---------|----------------------------------------|-------------------------------------|---------------------------------|------------------------------------------|--------------------------------------|---------------------------------|-------------------------------------------|-----------------------------------------------|-------------------------------------------|----------------------------------------|----------------------------------|-------------------------------------------|-----------------------------------------------|-------------------------------------------|----------------------------------------|----------------------------------|
|                   |           |         | Spiked Conc.<br>(ng cm <sup>-2</sup> ) | XRF Conc.<br>(ng cm <sup>-2</sup> ) | Blank<br>(ng cm <sup>-2</sup> ) |                                          | ERG Values<br>(ng cm <sup>-2</sup> ) | Blank<br>(ng cm <sup>-2</sup> ) | Spiked vs. CES<br>(CES - spiked) / spiked | Spiked vs. IDAEA<br>(IDAEA - spiked) / spiked | Spiked vs. ERG<br>(ERG - spiked) / spiked | IDAEA vs. CES<br>(CES - IDAEA) / IDAEA | ERG vs. CES<br>(CES - ERG) / ERG | Spiked vs. CES<br>(CES - spiked) / spiked | Spiked vs. IDAEA<br>(IDAEA - spiked) / spiked | Spiked vs. ERG<br>(ERG - spiked) / spiked | IDAEA vs. CES<br>(CES - IDAEA) / IDAEA | ERG vs. CES<br>(CES - ERG) / ERG |
| 21.04.2016 11:50  | PQ042116A | Zn      | 97.4                                   | 88.1                                | 10.2                            | 133.1                                    |                                      |                                 | -9.6                                      | 36.6                                          |                                           | -33.8                                  |                                  | -9.7                                      | 32.0                                          | 22.4                                      | -30.3                                  | -24.6                            |
| 21.04.2016 12:25  | PQ042116B |         | 97.4                                   | 89.2                                | 10.2                            | 155.0                                    |                                      |                                 | -8.4                                      | 59.1                                          |                                           | -42.4                                  |                                  |                                           |                                               |                                           |                                        |                                  |
| 21.04.2016 13:00  | PQ042116C |         | 97.4                                   | 83.5                                | 10.2                            | 97.7                                     |                                      |                                 | -14.3                                     | 0.3                                           |                                           | -14.5                                  |                                  |                                           |                                               |                                           |                                        |                                  |
| 21.04.2016 15:13  | PQ042116D |         | 97.4                                   | 88.3                                | 10.2                            |                                          | 104.1                                | 30.7                            | -9.3                                      |                                               | 6.8                                       |                                        | -15.1                            |                                           |                                               |                                           |                                        |                                  |
| 21.04.2016 15:46  | PQ012116E |         | 97.4                                   | 92.4                                | 10.2                            |                                          | 123.2                                | 30.7                            | -5.1                                      |                                               | 26.4                                      |                                        | -25.0                            |                                           |                                               |                                           |                                        |                                  |
| 21.04.2016 16:19  | PQ042116F |         | 101.5                                  | 90.2                                | 10.2                            |                                          | 136.0                                | 30.7                            | -11.2                                     |                                               | 34.0                                      |                                        | -33.7                            |                                           |                                               |                                           |                                        |                                  |
| 21.04.2016 11:50  | PQ042116A | Sr      | 206.0                                  | 191.6                               |                                 | 178.6                                    |                                      |                                 | -7.0                                      | -13.3                                         |                                           | 7.3                                    |                                  | -6.2                                      | -15.7                                         | -7.0                                      | 12.7                                   | 0.8                              |
| 21.04.2016 12:25  | PQ042116B |         | 206.0                                  | 194.0                               |                                 | 194.5                                    |                                      |                                 | -5.8                                      | -5.6                                          |                                           | -0.2                                   |                                  |                                           |                                               |                                           |                                        |                                  |
| 21.04.2016 13:00  | PQ042116C |         | 206.0                                  | 193.9                               |                                 | 147.8                                    |                                      |                                 | -5.9                                      | -28.2                                         |                                           | 31.1                                   |                                  |                                           |                                               |                                           |                                        |                                  |
| 21.04.2016 15:13  | PQ042116D |         | 206.0                                  | 191.6                               |                                 |                                          | 190.5                                | 1.5                             | -7.0                                      |                                               | -7.5                                      |                                        | 0.5                              |                                           |                                               |                                           |                                        |                                  |
| 21.04.2016 15:46  | PQ012116E |         | 206.0                                  | 194.0                               |                                 |                                          | 189.8                                | 1.5                             | -5.8                                      |                                               | -7.9                                      |                                        | 2.2                              |                                           |                                               |                                           |                                        |                                  |
| 21.04.2016 16:19  | PQ042116F |         | 206.0                                  | 193.9                               |                                 |                                          | 194.6                                | 1.5                             | -5.9                                      |                                               | -5.5                                      |                                        | -0.3                             |                                           |                                               |                                           |                                        |                                  |
| 21.04.2016 11:50  | PQ042116A | Cu      | 127.6                                  | 108.1                               |                                 | 111.9                                    |                                      |                                 | -15.3                                     | -12.3                                         |                                           | -3.4                                   |                                  | -13.6                                     | -17.0                                         | 5.8                                       | 5.9                                    | -18.2                            |
| 21.04.2016 12:25  | PQ042116B |         | 127.6                                  | 110.6                               |                                 | 117.8                                    |                                      |                                 | -13.3                                     | -7.7                                          |                                           | -6.1                                   |                                  |                                           |                                               |                                           |                                        |                                  |
| 21.04.2016 13:00  | PQ042116C |         | 127.6                                  | 111.9                               |                                 | 87.9                                     |                                      |                                 | -12.3                                     | -31.1                                         |                                           | 27.2                                   |                                  |                                           |                                               |                                           |                                        |                                  |
| 21.04.2016 15:13  | PQ042116D |         | 127.6                                  | 108.1                               | 0.8                             |                                          | 131.2                                | 1.3                             | -15.3                                     |                                               | 2.8                                       |                                        | -17.6                            |                                           |                                               |                                           |                                        |                                  |
| 21.04.2016 15:46  | PQ012116E |         | 127.6                                  | 110.6                               | 0.8                             |                                          | 129.4                                | 1.3                             | -13.3                                     |                                               | 1.4                                       |                                        | -14.5                            |                                           |                                               |                                           |                                        |                                  |
| 21.04.2016 16:19  | PQ042116F |         | 127.6                                  | 111.9                               | 0.8                             |                                          | 144.3                                | 1.3                             | -12.3                                     |                                               | 13.1                                      |                                        | -22.5                            |                                           |                                               |                                           |                                        |                                  |
| 21.04.2016 11:50  | PQ042116A | Pb      | 20.5                                   | NR                                  |                                 | 22.6                                     |                                      |                                 | NR                                        | 10.3                                          |                                           | NR                                     |                                  | NR                                        | 32.4                                          | 57.7                                      | NR                                     | NR                               |
| 21.04.2016 12:25  | PQ042116B |         | 20.5                                   | NR                                  |                                 | 37.9                                     |                                      |                                 | NR                                        | 84.7                                          |                                           | NR                                     |                                  |                                           |                                               |                                           |                                        |                                  |
| 21.04.2016 13:00  | PQ042116C |         | 20.5                                   | NR                                  |                                 | 20.9                                     |                                      |                                 | NR                                        | 2.1                                           |                                           | NR                                     |                                  |                                           |                                               |                                           |                                        |                                  |
| 21.04.2016 15:13  | PQ042116D |         | 20.5                                   | NR                                  |                                 |                                          | 27.1                                 | 1.1                             | NR                                        |                                               | 32.0                                      |                                        | NR                               |                                           |                                               |                                           |                                        |                                  |
| 21.04.2016 15:46  | PQ012116E |         | 20.5                                   | NR                                  |                                 |                                          | 29.1                                 | 1.1                             | NR                                        |                                               | 41.8                                      |                                        | NR                               |                                           |                                               |                                           |                                        |                                  |
| 21.04.2016 16:19  | PQ042116F |         | 20.5                                   | NR                                  |                                 |                                          | 40.9                                 | 1.1                             | NR                                        |                                               | 99.4                                      |                                        | NR                               |                                           |                                               |                                           |                                        |                                  |
| 21.04.2016 11:50  | PQ042116A | Fe      | 3024.6                                 | 2759.6                              |                                 | 2827.6                                   |                                      |                                 | -8.8                                      | -6.5                                          |                                           | -2.4                                   |                                  | -8.1                                      | -3.6                                          | -0.8                                      | -2.1                                   | -7.2                             |
| 21.04.2016 12:25  | PQ042116B |         | 3024.6                                 | 2795.5                              |                                 | 3543.9                                   |                                      |                                 | -7.6                                      | 17.2                                          |                                           | -21.1                                  |                                  |                                           |                                               |                                           |                                        |                                  |
| 21.04.2016 13:00  | PQ042116C |         | 3024.6                                 | 2786.4                              |                                 | 2377.9                                   |                                      |                                 | -7.9                                      | -21.4                                         |                                           | 17.2                                   |                                  |                                           |                                               |                                           |                                        |                                  |
| 21.04.2016 15:13  | PQ042116D |         | 3024.6                                 | 2759.6                              | 154.5                           |                                          | 2901.2                               | 140.5                           | -8.8                                      |                                               | -4.1                                      |                                        | -4.9                             |                                           |                                               |                                           |                                        |                                  |
| 21.04.2016 15:46  | PQ012116E |         | 3024.6                                 | 2795.5                              | 154.5                           |                                          | 2901.2                               | 140.5                           | -7.6                                      |                                               | -4.1                                      |                                        | -3.6                             |                                           |                                               |                                           |                                        |                                  |
| 21.04.2016 16:19  | PQ042116F |         | 3024.6                                 | 2786.4                              | 154.5                           |                                          | 3202.9                               | 140.5                           | -7.9                                      |                                               | 5.9                                       |                                        | -13.0                            |                                           |                                               |                                           |                                        |                                  |

Tests with specifically produced reference samples of Fe, Cu, Zn, Sr, and Pb (Table S2) showed relative differences between the measured concentrations and the theoretically expected concentrations ranging from -6.2 % (Sr) to -13.6 % (Cu) for benchtop XRF, on average -9.4 % (without Pb). For all these elements, XRF underestimated the expected value, as expected for absorption of fluorescence radiation by the quartz fiber material (Tanner et al. 1974). ICP showed differences between -17 % and +32 % (average 5.6 %) for IDAEA-CSIC, and -7 % and +58 % (average 15.6 %) for ERG. The scatter is much larger than for the field samples, and differences can be positive or negative.

S3. Diurnal variations of elements for fireworks and non-fireworks periods

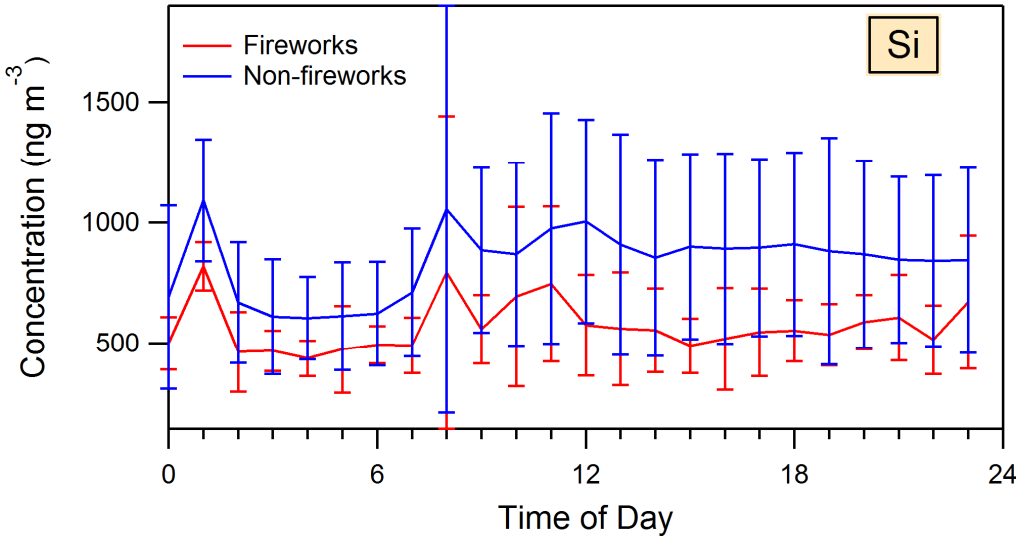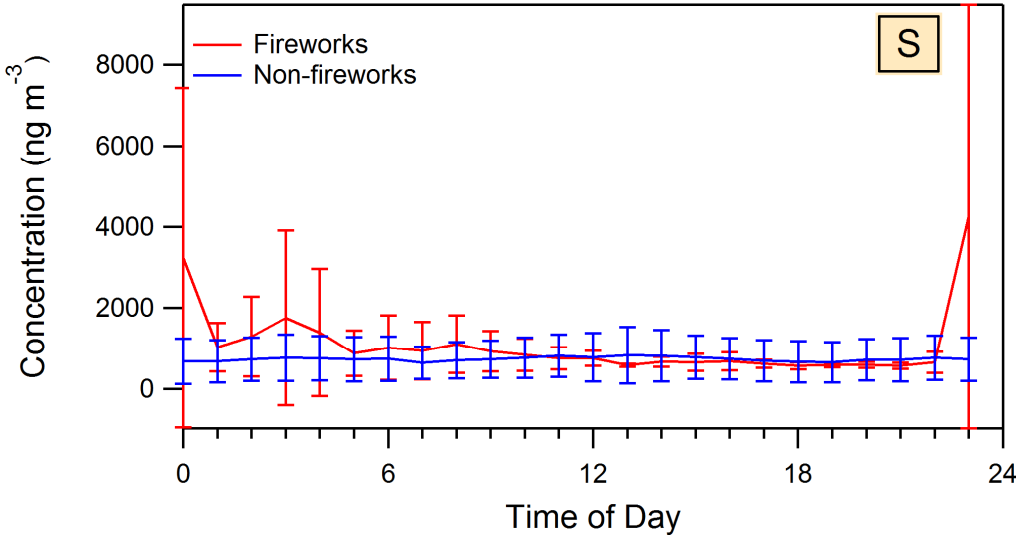

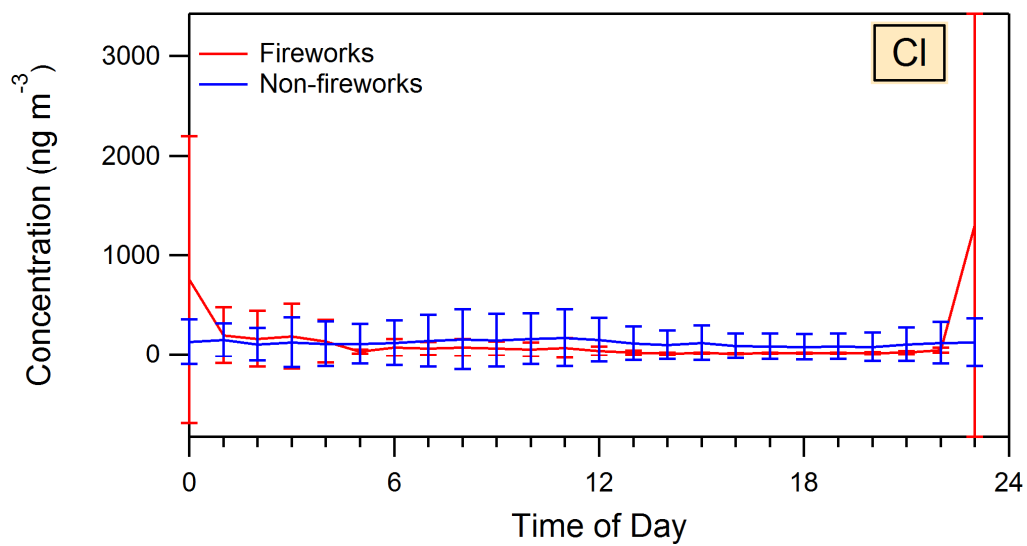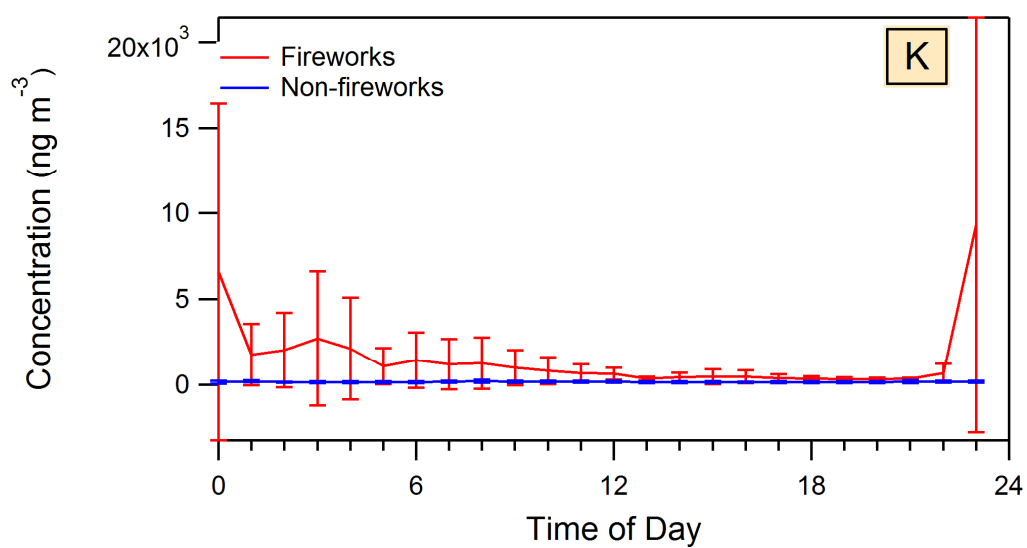

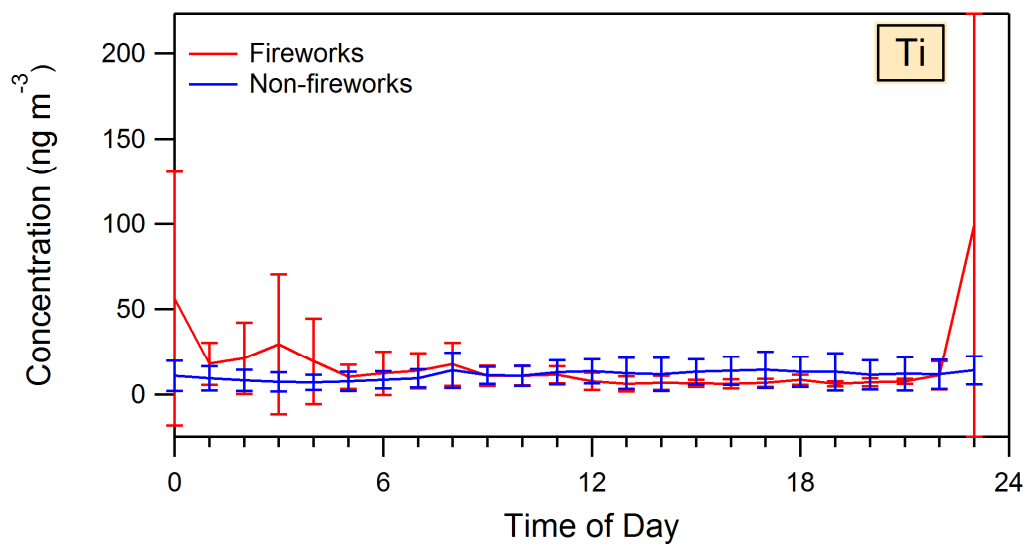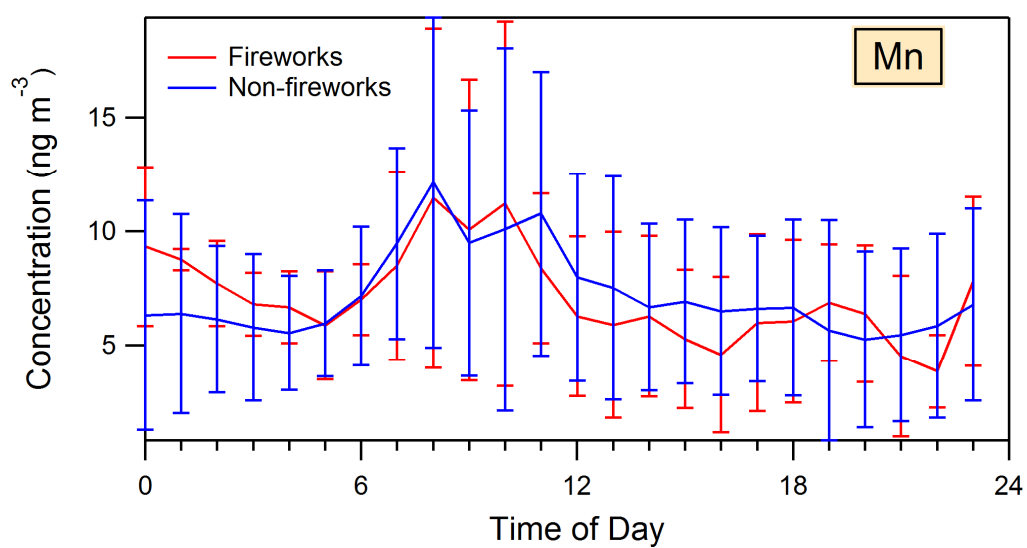

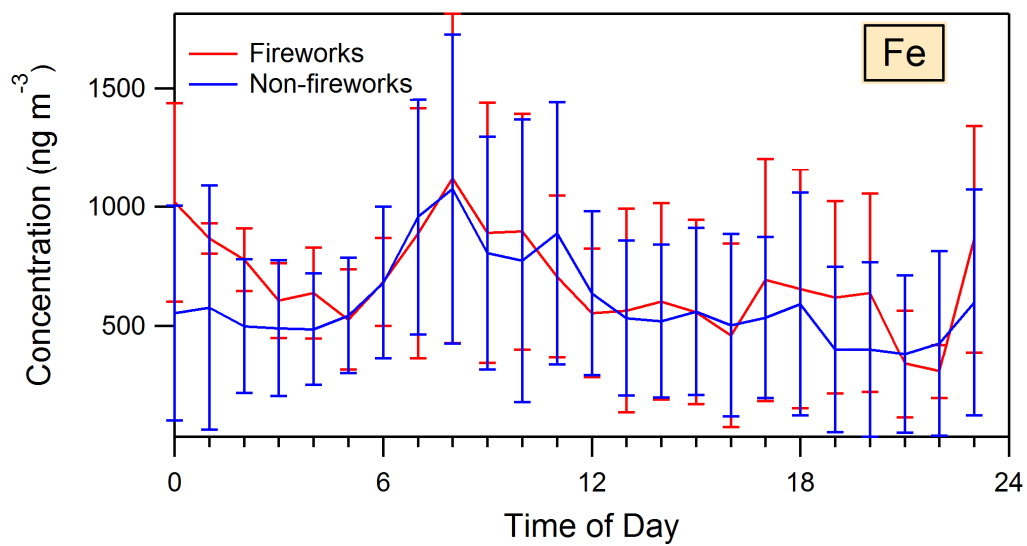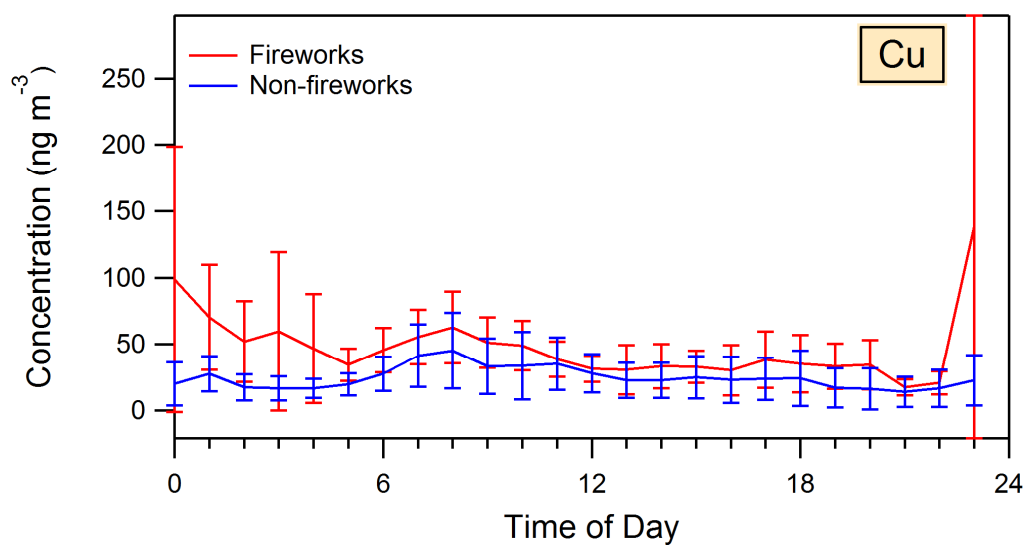

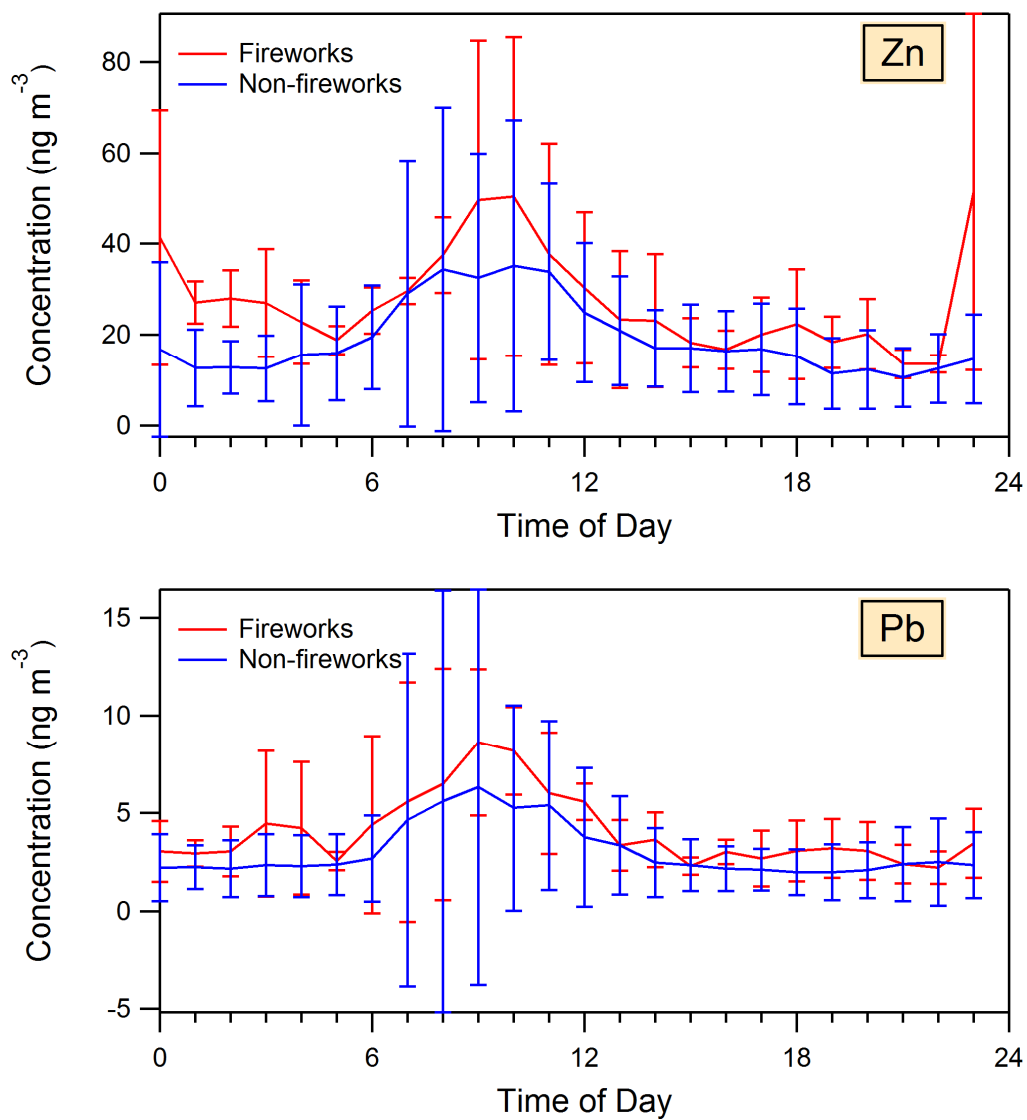

Figure S3: Diurnal variations of the Group A elements Si, S, Cl, K, Ti, Mn, Fe, Cu, Zn, and Pb. See Fig. 7.



S4. Diurnal variations of elements for north and south wind sectors

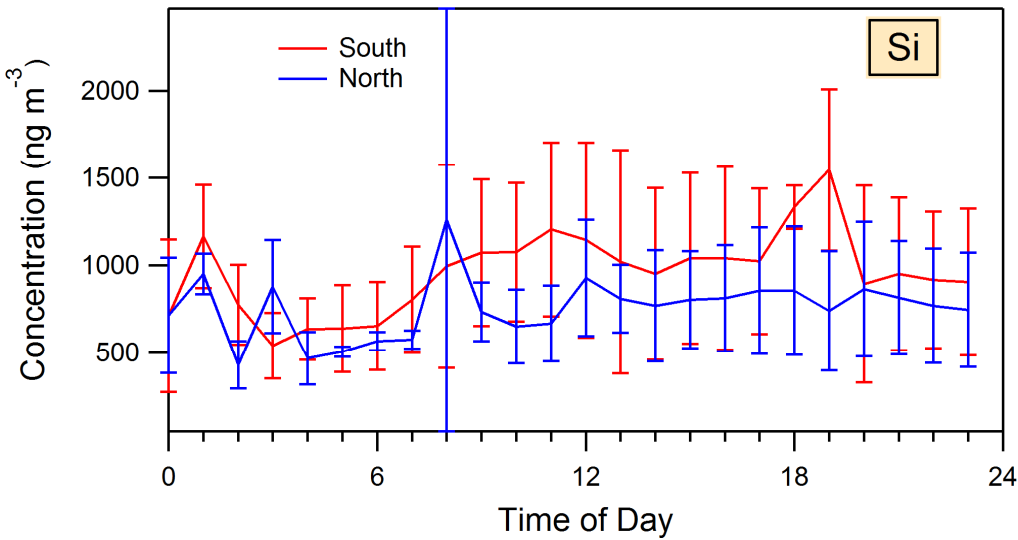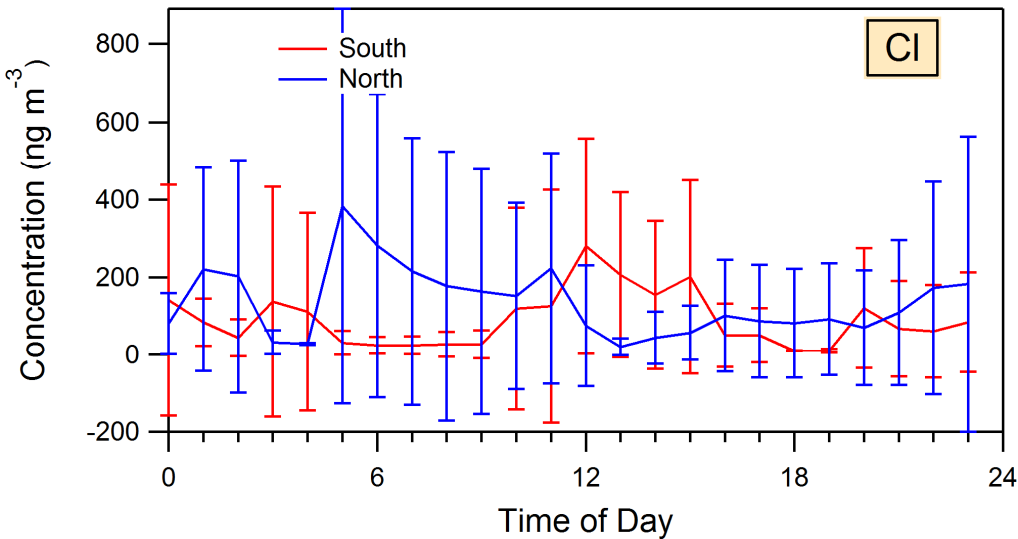

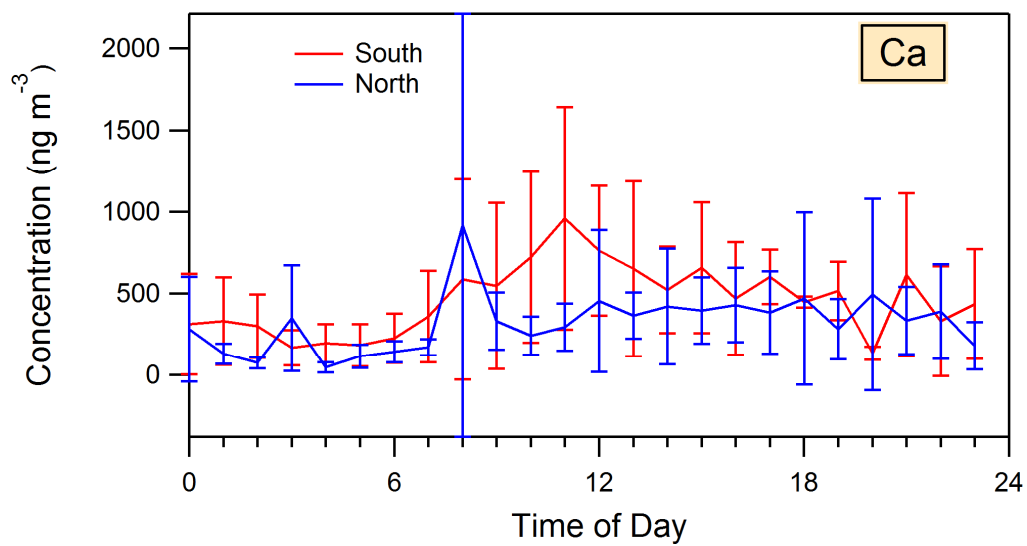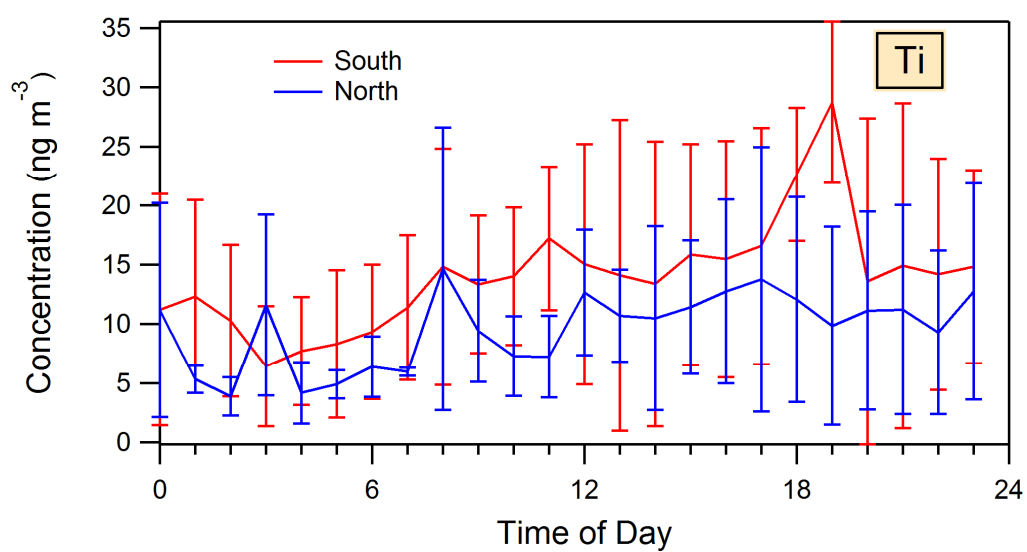

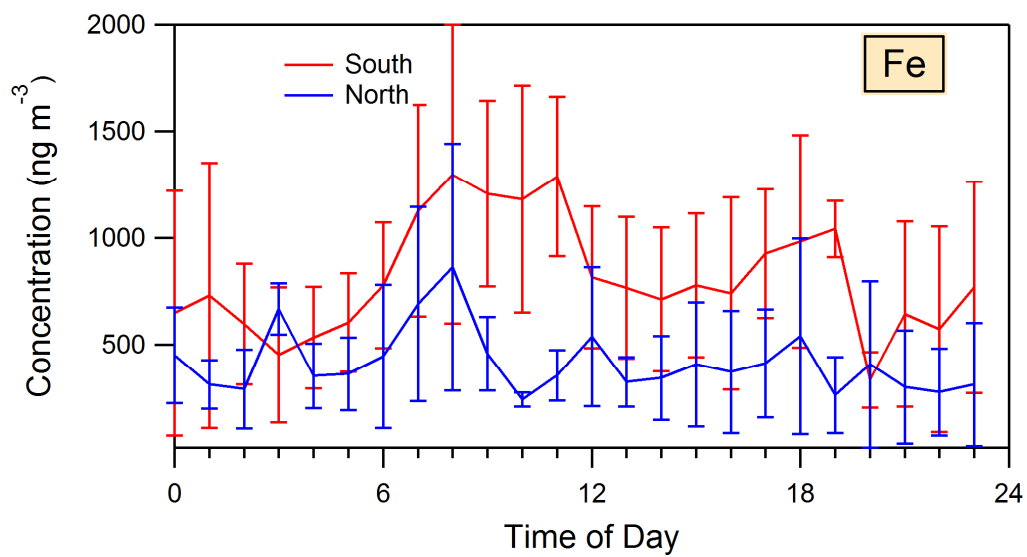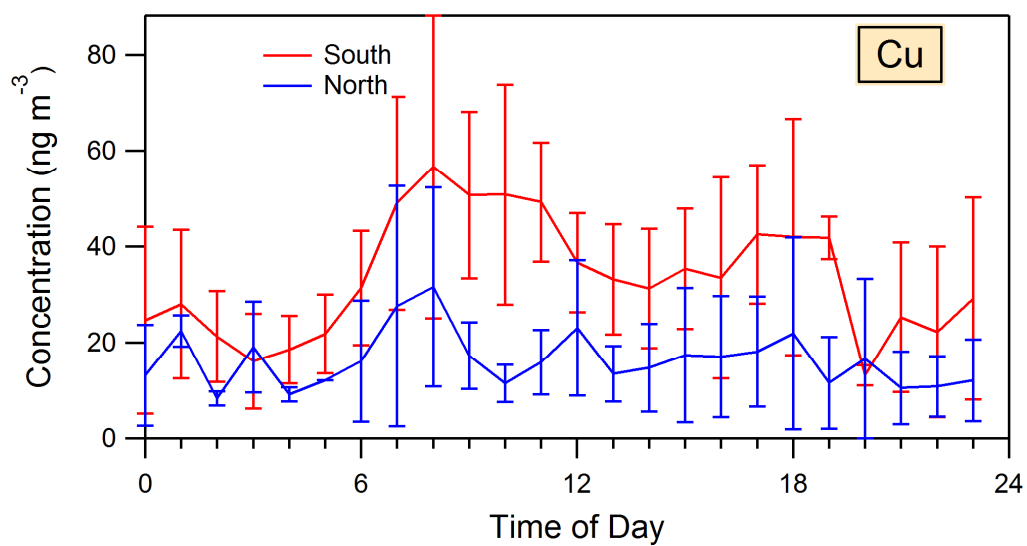

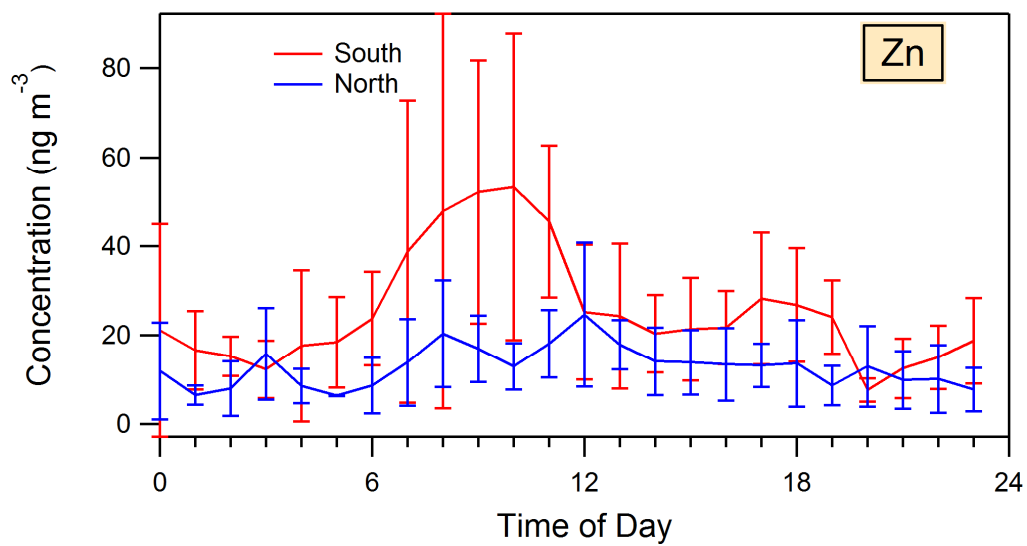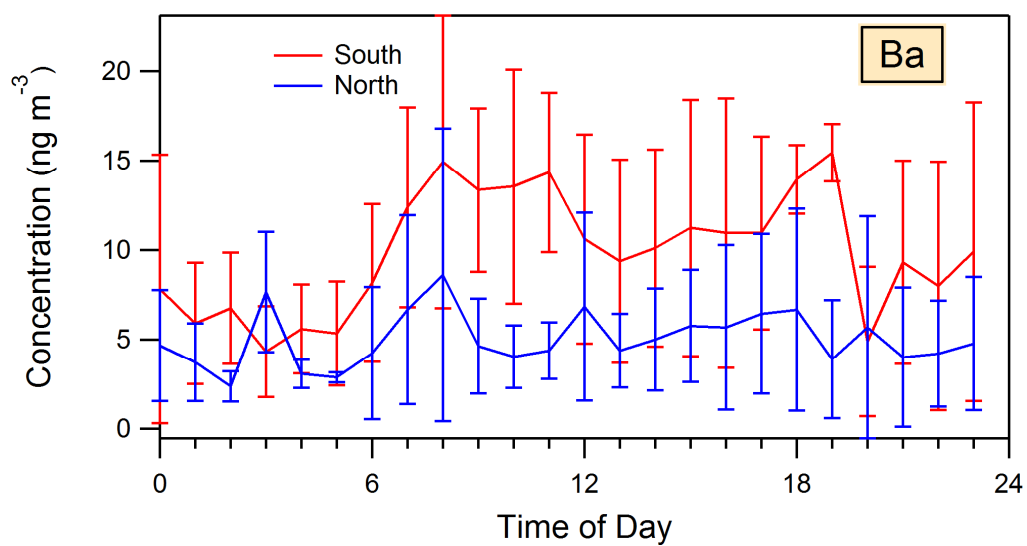

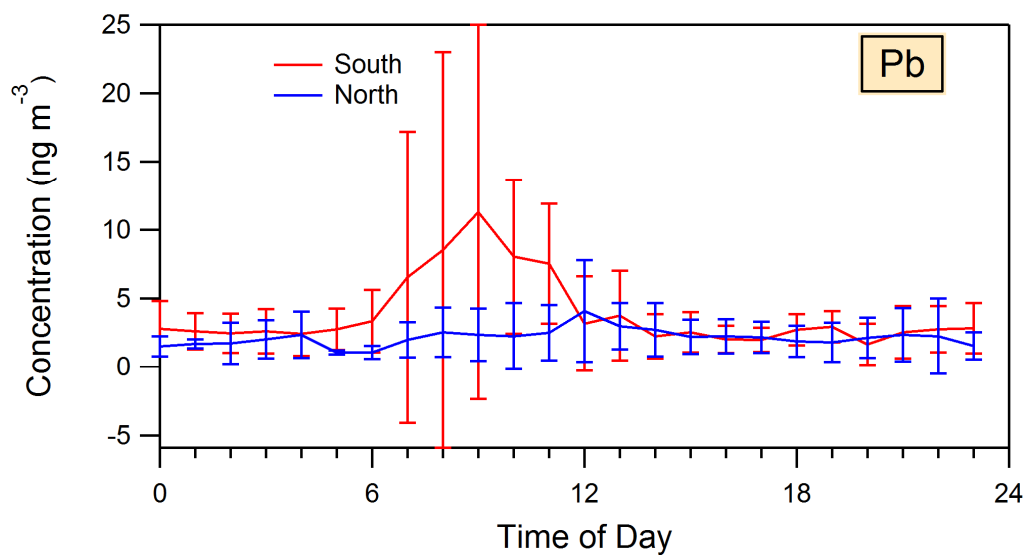

Figure S4: Diurnal variations of the Group A elements Si, Cl, K, Ca, Ti, Mn, Fe, Cu, Zn, Ba, and Pb. South means a wind from the freeway towards the station. See Fig. 10.

#### Reference

Tanner, T. M., Young, J. A., and Cooper, J. A.: Multielement analysis of St. Louis aerosols by nondestructive techniques,  
 5 Chemosphere, 3, 211-220, 1974.
